# Supplementary material for: Misclassification of Gleason grade and tumor stage in Asian-American patients with low-risk prostate cancer: A SEER-Based Analysis
Source: Research Square preprint supplement (doi:10.21203/rs.3.rs-1012252/v1), 2021-11-02
Supplement: Supplementary file 1 [file 9db487a3e1dc3a231daaf1a6.docx]

Table S3: Uni- and multivariate logistic regression analyses to explore risk factors of upgrading in Asian patients with low risk prostate cancer

|  | Univariate | | Multivariate | |
| --- | --- | --- | --- | --- |
|  | OR (95% CI) | *P* | OR (95% CI) | *P* |
| Race |  | *0.041* |  | *0.034* |
| Japanese | Reference |  | Reference |  |
| South Asian | 0.404 (0.206-0.787) | *0.008* | 0.393 (0.194-0.796) | *0.010* |
| Chinese | 0.445 (0.229-0.866) | *0.017* | 0.406 (0.202-0.819) | *0.012* |
| Other Asian | 0.489 (0.278-0.862) | *0.013* | 0.448 (0.246-0.813) | *0.008* |
| Age | 1.027 (1.001-1.053) | *0.039* | 1.024 (0.996-1.052) | *0.093* |
| PSA | 1.157 (1.048-1.278) | *0.004* | 1.138 (1.022-1.268) | *0.019* |
| Clinical T stage | 0.913 (0.498-1.674) | *0.768* |  |  |
| Number of biopsy cores | 0.956 (0.917-0.998) | *0.038* | 0.905 (0.843-0.971) | *0.005* |
| Number of positive cores | 1.218 (1.111-1.336) | *<0.001* | 1.401 (1.166-1.685) | *<0.001* |
| Core ratio | 5.665 (2.374-13.518) | *<0.001* | 0.262 (0.038-1.799) | *0.173* |

OR=odds ratio, CI=confidence interval, PSA=prostate specific antigen
